# Supplementary material for: Cardiovascular Disease Modeling Using Patient-Specific Induced Pluripotent Stem Cells
Source: Int J Mol Sci. 2015 Aug 12;16(8):18894–922. doi: 10.3390/ijms160818894 (PMC4581278; doi:10.3390/ijms160818894)
Supplement: Supplementary file 1 [file ijms-16-18894-s001.xlsx]

## Sheet: Table S1
Table S1. Summary of published studies in cardiovascular disease modeling using patient-specific iPSC system
Disease modelled	Gene mutation	Number of patients enrolled	Control enrolled	Cellular phenotypes (cell evaluated)	Rescue tested	Year	Reference
ARVC/D	Homozygous frame-shift mutation in PKP2 causing cryptic splicing (c.2484C>T) and heterozygous deletion mutation in PKP2 (2013delC)	2 (unrelated)	2 (a human ESC and a healthy subject)	Exaggerated lipogenesis, apoptosis, calcium handling abnormality, and metabolic derangement by coactivation of PPARα and PPARγ(CMs).	no	2013	96
	Heterozygous missense mutation in PKP2 (L614P)	1	1 healthy subject	Reduced desmosomal proteins and accumulated lipogenesis (CMs).	no	2013	97
	Heterozygous frame-shift mutation in PKP2 (A324fs335X)	2 (unrelated)	1 healthy subject	Augmented desmosomal distortion and lipid accumulation by adipogenic stress (CMs).	BIO, a specific inhibitor of glycogen synthase kinase 3β, prevented intracellular lipid droplet buildup in CMs.	2013	98
CPVT	Novel heterozygous missense mutation in RYR2 (F2483I)	1	1 healthy subject	Higher amplitudes and longer durations of spontaneous Ca2+ release and catecholaminergic stimulation-induced arrhythmias and DAD (CMs).	no	2011	99
	Novel heterozygous missense mutation in RYR2 (S406L)	1	1 healthy subject	Elevated diastolic Ca2+ concentrations, reduced SR Ca2+ content, and increased susceptibility to arrhythmias under catecholaminergic stress (CMs).	Dantrolene restored normal Ca2+ spark properties and rescued the arrhythmogenic phenotype.	2012	100
	Homozygous missense mutation in CASQ2 (D307H)	2 (unrelated)	2 healthy subjects	Isoproterenol-induced DAD, oscillatory arrhythmic prepotentials, and diastolic intracellular Ca2+ rise (CMs).	no	2012	101
	Heterozygous missense mutation in RYR2 (P2328S)	1	2 healthy subjects	Aberrant Ca2+ cycling resulting in DAD and EAD (CMs).	no	2012	102
	Heterozygous missense mutation in RYR2 (M4109R)	1	1 healthy subject	Under adrenergic stimulation, increased frequency and magnitude of DADs, leading to triggered activity (CMs).	Flecainide and thapsigargin eliminated afterdepolarization.	2012	103
	Novel heterozygous missense mutation in RYR2 (F2483I)	1	1 healthy subject	Aberrant Ca2+ signaling, smaller Ca2+ stores, higher CICR gains, and sensitized adrenergic agonists (CMs).	no	2013	104
	Heterozygous missense mutation in RYR2 (E2311D)	1	1 healthy subject	Development of DAD both in resting conditions and after β-adrenergic stimulation (CMs).	KN-93, CaMKII inhibitor, rescued the arrhythmic phenotype induced by catecholaminergic stress resulting in attenuation of Ca2+ instability.	2013	105
Diabetic cardiomyopathy	not described	2 (FP or SP type)	not described	Successful induction into the surrogate phenotype in the CMs by mimicking the diabetic extracellular milieu. In addition, in vitro severity of phenotypes depends on the original clinical condition.	Wide spectrum screening by using Ca2+ homeostasis-related compounds were performed.	2014	53
DCM	Novel heterozygous frame-shift mutation in LMNA (S17fs40X)	1	normal human fibroblasts	Increased nuclear abnormality, senescence, and electrical stimulation-induced apoptosis in the primary and iPSC-derived fibroblasts.	no	2011	106
	Heterozygous non-sense mutation in LMNA (R225X)	1	1 healthy subject	Increased nuclear senescence and cellular apoptosis (CMs).	U0126 and selumetinib (AZD6244), MEK1/2 inhibitors, attenuated the pro-apoptotic effects.	2012	107
	Heterozygous missense mutation in TNNT2 (R173W)	4 (related)	3 healthy subject from affected family	Altered regulation of Ca2+, decreased contractility, and abnormal distribution of sarcomeric protein, which are augmented by adrenergic stress (CMs).	Metoprolol or overexpression of Serca2a improved the cellular phenotypes.	2012	108
	Novel heterozygous missense mutation in DES (A285V)	1	1 healthy subject	Structural disruption with abnormal DES-distribution within the CMs	no	2013	109
HCM	Heterozygous missense mutation in MYH7 (R663H)	5 (related)	5 healthy subjects from affected family	Enlarged and disorganized CMs with abnormal intracellular Ca2+ handling, including increased Ca2+ affinity and intracellular Ca2+ overload.	Drug screening were also conducted. Cellular phenotypes were mitigated by propranolol, lidocaine, mexiletine, ranolazine, verapamil, diltiazem, and nifedipine.	2013	110
	Heterozygous missense mutation in MYH7 (R442G)	1	Unrelated 2 healthy subjects	Enlarged and disorganized CMs. Prolonged APD and irregular beatings with Ca2+ dyshandling. Enhanced Ca2+, Na+, and Ito+ current.	Metoprolol and verapamil reduced arrhythmogenic irregular beatings. TSA, a pan-inhibitor of histone deacetylases, ameliorated cellular phenotypes.	2014	111
	Heterozygous deletion mutation in MYBPC3 (G999_Q1004del) Heterozygous missense mutation in TPM1 (R91C)	3 (unrelated)	Unrelated 3 healthy subjects	Enlarged and disorganized CMs. Exaggerated such phenotypes and contractile dispersion by ET-1 stimulation.	Type A ET receptor blocker attenuated ET-1-induced cellular phenotypes.	2014	112
HCM-related disorders
Barth syndrome	Heterozygous missense mutation in TAZ1 (G197V) and novel (R57L) Heterozygous splicing mutation in TAZ1 (r.spl. Ex2del?)	3 (unrelated)	1 healthy subject	Abnormal CL remodeling, altered mitochondrial oxygen consumption, and increased generation of ROS (iPSCs).	no	2013	113
	Heterozygous frame-shift mutation in TAZ1 (c.517delG) Heterozygous missense mutation in TAZ1 (c.328T>C)	2 (unrelated)	Unrelated 3 healthy subjects	Mitochondrial abnormalities, such as oxygen consumption and higher ROS production, abnormal sarcomerogenesis (CMs), Depressed contractile stress generation (Bioengineered myocardial tissue using iPSC-CMs)	Linoleic acid, an essential fatty acid precursor of mature CL, reversed metabolic and structural phenotypes.	2014	59
CPT II deficiency	Heterozygous deletion and missense mutation in CPT2 (1223delCT and R631C)	1	1 healthy subject	More accumulated palmitoylcarnitine and higher susceptibility to heat stress (myocytes).	Bezafibrate, an agonist of PPAR, reduced palmitoylcarnitine content.	2014	114
Friedreich's ataxia	Trinucleotide (GAA) repeat expansion (1026/532, 718/226, respectively) in FXN	2 (unrelated)	1 healthy subject	Neural and cardiac differentiation ability with preserved GAA expansion, followed by reduced expression level of FXN (iPSCs).	no	2011	115
	Expanded GAA repeats (800/600 and 900/400, respectively) in FXN	2 (unrelated)	Unrelated 2 healthy subjects	Differentiated neurons and CMs exhibited physiological and structural abnormalities within mitochondria.	no	2013	116
	Expanded GAA repeats (number not described) in FXN	1	1 healthy subject	Iron overload-induced abnormalities in mitochondrial activity and Ca2+ handling (CMs).	no	2014	117
LEOPARD syndrome	Heterozygous missense mutation in PTPN11 (T468M)	2 (unrelated)	Unrelated 2 healthy subjects	Enlarged and disorganized CMs with higher prevalence of NFAT nuclear translocation. Abnormal molecular response in diseased iPSCs by proteomic assays.	no	2010	118
Pompe disease	Homozygous substitution mutation in GAA (1935C>A/1935C>A and 1935C>A/2040+1G>T)	2 (unrelated)	1 healthy subject	Low GAA activity and high glycogen content in the iPSCs. Higher glycogen content and ultrastructural abnormality, including disarrayed myofibrils, glycogen-containing vacuoles, and deteriorated mitochondria characterized by swollen cristae in the CMs.	Recombinant human GAA, which has been regularly used for Pompe disease treatment, reduced glycogen content. L-carnitine, which is an endogenous substance required for the transport of fatty acids from the cytosol into the mitochondria, improved mitochondrial dysfunction.	2011	90
LQT syndrome
LQT1	Heterozygous missense mutation in KCNQ1 (R190Q)	2	2 healthy subjects	Prolonged APD and dominant negative trafficking defect of KCNQ1, resulting in IKs channel dysfunction (CMs).	Propranolol attenuated isoproterenol-induced EAD and APD prolongation.	2010	119
	Novel heterozygous deletion mutation in KCNQ1 (P631fs/33)	1	Unrelated 2 healthy subjects	Prolonged FPD on MEA system which is worsened by IKr blockade, but not IKs blockade, suggesting dysfunction of IKs channel and IKr dependent manner (contracting EBs).	Propranolol eliminated propranolol- induced VT-like arrhythmias.	2012	120
LQT2	Heterozygous missense mutation in KCNH2 (A614V)	1	1 healthy subject	Prolongation of A/FPD and marked EAD (CMs).	Nifedipine, pinacidil, and ranolazine ameliorated arrhythmogenic phenotypes.	2011	121
	Heterozygous missense mutation in KCNH2 (A561T)	1 (daughter)	2 (mother, asymptomatic carrier for the same mutation, and iPSC line generated from human ESC-derived fibroblast)	Prolonged A/FPD and increased IKr channel blocker or isoprenaline-induced EAD (CMs).	Propranolol, nadolol, and potassium channel enhancers (nicorandil and PD118057) shortened APD and abolished EAD.	2011	122
	Heterozygous missense mutation in KCNH2 (R176W)	1 (asymptomatic)	1 healthy subject	Prolonged APD and higher sensitivity to arrhythmogenic drugs, including sotalol, leading to arrhythmogenic electrical activity (CMs).	no	2012	123
	Novel heterozygous missense mutation in KCNH2 (G603D)	1	no	(Only generation of iPSC)	no	2013	124
	Heterozygous missense mutation in KCNH2 (N996I)	1	normal human ESC and mutation-corrected iPSC from the same patient	By using isogenic control lines by gene targeting, the mutation in KCNH2 were identified as a primary cause of phenotype (CMs).	Gene correction	2013	58
	Heterozygous missense mutation in KCNH2 (A561T)	1 (daughter)	2 (mother, asymptomatic carrier for the same mutation, and father, genetically normal)	Prolonged A/FPD and IKr channel blocker-induced EAD (CMs)	Knockdown of the mutated KCNH2 mRNA was induced by allele-specific siRNA.	2014	125
LQT3	Novel heterozygous missense mutation in SCN5A (F1473C) and a polymorphism (K897T) in KCNH2	1	2 (mother, homozygous for the same KCNH2 polymorphism, and father, genetically normal)	Na+ channel defect responsible for the arrhythmias, but not influenced by the KCNH2 polymorphism (CMs).	Mexiletine improved Na+ channel function.	2013	126
	Heterozygous missense mutation in SCN5A (V1763M)	1	1 (healthy sister without mutation)	Prolonged APD and increased tetrodotoxin-sensitive late or persistent Na+ current (CMs).	Mexiletine reversed increased Na+ current and prolonged APD.	2013	127
(+ Brugada syndrome)	Heterozygous insertion mutation in SCN5A (1795insD)	1	1 healthy subject	Electrophysiologically combined phenotypes caused by gain- and loss-of function in Na+ channel mutation (CMs)	no	2012	128
LQT8	Heterozygous missense mutation in CACNA1C (G406R)	2 (unrelated)	Unrelated 2 healthy subjects	Irregular/slow contraction and prolonged APD in contracting EBs. Irregular electrical activity and abnormal calcium transients in ventricular-like CMs.	Roscovitine, a compound that increases the voltage-dependent inactivation of Ca2+ channel, restored the electrical and Ca2+ signaling properties.	2011	129
Marfan syndrome	ESC: heterozygous deletion mutation in FBN1 (1747delC) iPSC: heterozygous splicing mutation (c.3839-1 G>T)	2 (human ESC and iPS)	2 (human ESC and iPS)	Enhanced activity of TGF-β signaling impaired osteoblastic differentiation via inhibition of BMP signaling (iPSCs)	Inhibition of endogenous TGF-β signaling by SB431542 and/or exogenous BMP-2 protein rescued osteogenic differentiation.	2012	130
SVAS	Heterozygous insertion mutation in ELN (240insGTAT)	1	1 healthy subject	Lower degree of organized smooth muscle α-actin filament bundles, proliferation at a higher rate, and faster migration in response to the chemotactic cytokine platelet-derived growth factor (SMCs).	Recombinant ELN or enhancement of small GTPase RhoA signaling rescues smooth muscle α-actin filament bundle formation. Attenuation of ERK 1/2 activity inhibits hyperproliferation of SMCs.	2012	131
APD, action potential duration; ARVC/D, arrhythmogenic right ventricular cardiomyopathy/dysplasia; BMP, bone morphogenetic protein; CaMKII, Ca2+/calmodulin-dependent protein kinase II; CICR, calcium-induced calcium release;
CL, cardiolipin; CM, cardiomyocyte; CPT II, carnitine palmitoyltransferase II: CPVT, catecholminergic polymorphic ventricular tachycardia; DAD, delayed afterdepolarization; DCM, dilated cardiomyopathy; DES, desmin;
EAD, early afterdepolarization; EB, embryoid body; ELN, elastin; ESC, embryonic stem cell; ET, endothelin; FP, fast progression; FPD, field potential duration; GAA, acid alpha-glucosidase; HCM, hypertrophic cardiomyopathy;
iPSC, induced pluripotent stem cell; LQT, long QT; MEA, multi-electrode array; NFAT, nuclear factor of activated T-cells; PPAR, peroxisome proliferator-activated receptor; ROS, reactive oxygen specie; SVAS, supravalvular aortic stenosis;
Serca2a, sarcoplasmic endoplasmic reticulum Ca2+ ATPase; SMC, smooth muscle cell; SP, slow progression; SR, sarcoplasmic reticulum; TGF, transforming growth factor; TSA, trichostatin A; VT, ventricular tachycardia.
